# Supplementary material for: Sperm Meiotic Segregation Analysis of Reciprocal Translocations Carriers: We Have Bigger FISH to Fry
Source: MDPI journal article supplement (doi:10.3390/ijms24043664), 2023-02-11
Supplement: s1 [file s1]

**Supplemental Table S1.** Statistical data associated to the Student *t*-test performed in Figure 2B. DoF = Degrees of Freedom ; CI = Confidence Interval.

| Groups                                  | t-Value  | DoF | p-Value | 95% CI                |
|-----------------------------------------|----------|-----|---------|-----------------------|
| Normozoospermia VS Abnormal seminogram  | 0.8875   | 188 | 0.3759  | -1.661043 / 4.378443  |
| Normozoospermia VS Only one defect      | 0.83149  | 155 | 0.407   | -2.075214 / 5.092099  |
| Normozoospermia VS Two defects          | -0.51997 | 136 | 0.6039  | -5.701207 / 3.327304  |
| Normozoospermia VS Three defects        | 1.614    | 126 | 0.109   | -1.048219 / 10.318699 |
| Abnormal seminogram VS Only one defect  | 0.070346 | 115 | 0.944   | -4.066686 / 4.366170  |
| Abnormal seminogram VS Two one defect   | -0.95854 | 96  | 0.3402  | -7.817313 / 2.726009  |
| Abnormal seminogram VS Three one defect | 1.3937   | 83  | 0.1671  | -2.231918 / 12.684084 |
| Only one defect VS Two defects          | -0.94521 | 63  | 0.3482  | -8.393912 / 3.003124  |
| Only one defect VS Three defects        | 1.3178   | 50  | 0.1936  | -2.66069 / 12.81337   |
| Two defects VS Three defects            | 1.8336   | 31  | 0.07633 | -0.872880 / 16.416350 |

**Supplemental Table S2.** Statistical data associated to the Student *t*-test performed in Figure 3A. DoF = Degrees of Freedom ; CI = Confidence Interval.

| Groups                                        | t-Value | DoF | p-Value | 95% CI               |
|-----------------------------------------------|---------|-----|---------|----------------------|
| Normozoospermia VS Oligozoospermia alone      | 0.9473  | 136 | 0.3451  | -2.453779 / 6.966729 |
| Normozoospermia VS Oligozoospermia associated | 1.1516  | 165 | 0.2511  | -1.458752 / 5.542268 |
| Oligozoospermia alone VS associated           | -0.0677 | 73  | 0.9462  | -6.532020 / 6.102587 |

**Supplemental Table S3.** Statistical data associated to the Student *t*-test performed in Figure 3C. DoF = Degrees of Freedom ; CI = Confidence Interval.

| Groups                                          | t-Value | DoF | p-Value | 95% CI               |
|-------------------------------------------------|---------|-----|---------|----------------------|
| Normozoospermia VS Asthenozoospermia alone      | 0.37098 | 125 | 0.7113  | -4.657645 / 6.806601 |
| Normozoospermia VS Asthenozoospermia associated | 0.75309 | 154 | 0.4525  | -2.159768 / 4.820923 |
| Asthenozoospermia a alone VS associated         | 0.08537 | 51  | 0.9323  | -5.766426 / 6.278624 |

**Supplemental Table S4.** Statistical data associated to the Student *t*-test performed in Figure 3E. DoF = Degrees of Freedom ; CI = Confidence Interval.

| Groups                                         | t-Value   | DoF | p-Value | 95% CI                |
|------------------------------------------------|-----------|-----|---------|-----------------------|
| Normozoospermia VS Teratozoospermia alone      | -0.054772 | 120 | 0.9564  | -7.631711 / 7.220834  |
| Normozoospermia VS Teratozoospermia associated | 0.81328   | 138 | 0.4175  | -2.609099 / 6.254958  |
| Teratozoospermia alone VS associated           | 0.42631   | 30  | 0.6729  | -7.688594 / 11.745330 |

**Supplemental Table S5.** Statistical data associated to the Student *t*-test performed in Figure 4A. DoF = Degrees of Freedom ; CI = Confidence Interval.

| Groups                        | t-Value | DoF | p-Value | 95% CI              |
|-------------------------------|---------|-----|---------|---------------------|
| No acrocentric VS Acrocentric | 1.9869  | 316 | 0.0478  | 0.027529 / 5.621170 |

**Supplemental Table S6.** Statistical data associated to the Student *t*-test performed in Figure 4B. To limit the size of the table, only significant results are presented. DoF = Degrees of Freedom ; CI = Confidence Interval.

| Groups          | t-Value | DoF | p-Value   | 95% CI               |
|-----------------|---------|-----|-----------|----------------------|
| Chr1 VS Chr22   | -2.6718 | 58  | 0.009777  | -13.59633 / -1.94949 |
| Chr2 VS Chr22   | -3.3077 | 59  | 0.001606  | -14.78053 / -3.63820 |
| Chr3 VS Chr22   | -2.7754 | 56  | 0.00748   | -13.75338 / -2.22246 |
| Chr4 VS Chr22   | -2.8528 | 71  | 0.00567   | -12.05256 / -2.13574 |
| Chr5 VS Chr22   | -3.2513 | 57  | 0.00193   | -16.73108 / -3.97696 |
| Chr6 VS Chr22   | -3.6179 | 60  | 0.00061   | -18.08700 / -5.20771 |
| Chr7 VS Chr22   | -3.8186 | 71  | 0.00028   | -13.58467 / -4.26447 |
| Chr8 VS Chr22   | -3.9101 | 65  | 0.00022   | -17.25789 / -5.58869 |
| Chr9 VS Chr22   | -4.2775 | 52  | 8.117e-05 | -16.30628 / -5.89240 |
| Chr10 VS Chr22  | -4.3853 | 61  | 4.658e-05 | -16.6958 / -6.23824  |
| Chr11 VS Chr22  | -3.1415 | 69  | 0.00247   | -16.54957 / -3.69430 |
| Chr12 VS Chr22  | -3.1829 | 37  | 0.00295   | -17.38552 / -3.86059 |
| Chr13 VS Chr22  | -3.1487 | 51  | 0.00274   | -16.47396 / -3.64572 |
| Chr14 VS Chr22  | -2.9701 | 39  | 0.00507   | -20.11488 / -3.81676 |
| Chr15 VS Chr22  | -3.1832 | 49  | 0.00253   | -14.67763 / -3.31737 |
| Chr16 VS Chr22  | -2.7335 | 40  | 0.00928   | -14.15925 / -2.12173 |
| Chr17 VS Chr22  | -4.1214 | 52  | 0.00013   | -16.75768 / -5.78306 |
| Chr18 VS Chr22  | -2.578  | 49  | 0.01299   | -14.26990 / -1.76819 |
| Chr19 VS Chr22  | -2.7136 | 30  | 0.01092   | -19.67094 / -2.77659 |
| Chr 20 VS Chr22 | -2.4952 | 31  | 0.01812   | -18.80326 / -1.88963 |

**Supplemental Table S7.** References included in this study.

| Year of Publication | Authors              | Number of Patients | % Alternate Range | References <sup>1</sup>                             |
|---------------------|----------------------|--------------------|-------------------|-----------------------------------------------------|
| 1983                | Balkan & Martin      | 2                  | 68,4-80,7         | 10.1007/BF00274760                                  |
| 1984                | Martin et al.        | 1                  | 23,1              | 10.1111/j.1399-0004.1984.tb02004.x                  |
| 1986                | Brandriff et al.     | 2                  | 37,1-37,3         | PMID: 3946422                                       |
| 1986                | Burns et al.         | 2                  | 27,4-69,6         | PMID: 3728467                                       |
| 1988                | Martin               | 1                  | 40,4              | 10.1159/000132504                                   |
| 1988                | Templado et al.      | 1                  | 73,4              | 10.1007/BF00291704                                  |
| 1989                | Pellestor et al.     | 4                  | 34,2-77,2         | PMID: 2818710                                       |
| 1990                | Martin et al.        | 1                  | 46,8              | 10.1093/oxfordjournals.humrep.a137153               |
| 1990                | Martin et al.        | 3                  | 43,3-52,7         | 10.1007/BF00205168                                  |
| 1990                | Templado et al.      | 1                  | 40,9              | 10.1007/BF00208932                                  |
| 1992                | Estop et al.         | 2                  | 39-46             | 10.1007/BF00194315                                  |
| 1992                | Jenderny             | 2                  | 34,2-56           | 10.1007/BF00210768                                  |
| 1992                | Martin               | 2                  | 39,5-45,6         | 10.1159/000133285                                   |
| 1992                | Spriggs et al.       | 1                  | 38,6              | 10.1007/BF00215680                                  |
| 1993                | Martin & Hulten      | 3                  | 34,1-47,7         | 10.1111/j.1601-5223.1993.00165.x                    |
| 1994                | Benkhalifa et al.    | 2                  | 27,9-49,3         | Rev Fr Gynecol Obstet (1994)                        |
| 1994                | Martin               | 1                  | 55,4              | 10.1093/oxfordjournals.humrep.a138739               |
| 1994                | Spriggs et Martin    | 1                  | 33,2              | 10.1002/mrd.1080380303                              |
| 1995                | Estop et al.         | 2                  | 40,2-48,0         | 10.1159/000133997                                   |
| 1995                | Martin & Spriggs     | 1                  | 46,9              | 10.1111/j.1399-0004.1995.tb03920.x                  |
| 1995                | Rousseaux et al.     | 3                  | 86,0-88,0         | 10.1159/000134118                                   |
| 1996                | Prigent et al.       | 1                  | 84,9              | Ninth French Cytogeneticists Congress, Paris (1996) |
| 1997                | Estop et al.         | 1                  | 61,1              | PMID: 9195156                                       |
| 1997                | Menicke et al.       | 2                  | 19-51             | PMID: 9466181                                       |
| 1997                | Pellestor et al.     | 2                  | 33,3-44,4         | 10.1159/000134657                                   |
| 1997                | Van Hummelen et al.  | 1                  | 48,1              | 10.1086/515516                                      |
| 1998                | Blanco et al.        | 1                  | 45,1              | 10.1159/000015170                                   |
| 1998                | Estop et al.         | 2                  | 43,6-44,4         | 10.1159/000015177                                   |
| 1998                | Martini et al.       | 1                  | 44,3              | 10.1007/s004390050670                               |
| 1998                | Mercier et al.       | 1                  | 56,7              | 10.1007/s004390050719                               |
| 1999                | Cifuentes et al.     | 1                  | 49,6              | 10.1038/sj.ejhg.5200274                             |
| 1999                | Durak et al.         | 1                  | 41,8              | 10.1034/j.1399-0004.1999.560206.x                   |
| 1999                | Estop et al.         | 1                  | 27,4              | 10.1007/s004390050977                               |
| 1999                | Giltay et al.        | 1                  | 51                | 10.1159/000015217                                   |
| 1999                | Honda et al.         | 2                  | 47,2-52,4         | 10.1007/s004399900161                               |
| 1999                | Van Assche et al.    | 1                  | 29,1              | 10.1093/molehr/5.7.682                              |
| 2001                | Oliver-Bonnet et al. | 1                  | 30,5              | 10.1038/sj.ejhg.5200654                             |
| 2002                | Alves et al.         | 1                  | 85,1              | 10.1038/sj.ejhg.5200835                             |
| 2002                | Cora et al.          | 4                  | 48,1-52,7         | PMID: 12399524                                      |
| 2002                | Geneix et al.        | 1                  | 19                | 10.1093/humrep/17.2.325                             |
| 2002                | Oliver-Bonnet et al. | 2                  | 39,2-41,6         | 10.1093/molehr/8.10.958                             |

|      |                         |    |             |                                   |
|------|-------------------------|----|-------------|-----------------------------------|
| 2002 | Trappe et al.           | 1  | 45          | 10.1159/000068533                 |
| 2003 | Bacetti et al.          | 1  | 32,8        | 10.1093/humrep/deg460             |
| 2003 | Escudero et al.         | 11 | 18,6-45,9   | 10.1016/s0015-0282(03)00252-8     |
| 2003 | Lim et al.              | 1  | 49,9        | 10.1002/ajmg.a.10893              |
| 2003 | Rives et al.            | 1  | 56,2        | 10.1007/s10038-003-0072-9         |
| 2004 | Anton et al.            | 2  | 42,9-45     | 10.1016/s1472-6483(10)61774-9     |
| 2004 | Morel et al.            | 2  | 54,68-62.84 | 10.1016/j.fertnstert.2003.07.034  |
| 2004 | Oliver-Bonet et al.     | 2  | 40,8-44,6   | 10.1093/humrep/deh492             |
| 2006 | Brugnon et al.          | 7  | 33-58,8     | 10.1093/humrep/dei401             |
| 2006 | Midro et al.            | 1  | 34          | 10.1002/ajmg.a.31083              |
| 2006 | Yakut et al.            | 4  | 37,1-51,3   | 10.1002/ajmg.a.31215              |
| 2007 | Kekesi et al.           | 3  | 20,2-54     | 10.1016/j.fertnstert.2006.11.097  |
| 2007 | Wiland et al.           | 2  | 34,4-34,8   | 10.2164/jandrol.106.000919        |
| 2008 | Nishikawa et al.        | 4  | 40,7-54     | 10.1111/j.1365-2605.2007.00759.x  |
| 2008 | Perrin et al.           | 1  | 54,3        | 10.1093/humrep/dem359             |
| 2008 | Vozdova et al.          | 3  | 44,5-59,9   | 10.1093/humrep/dem345             |
| 2008 | Wiland et al.           | 1  | 34,2        | 10.1002/pd.1899                   |
| 2009 | Vialard et al.          | 1  | 50,3        | 10.1016/s1472-6483(10)60133-2     |
| 2010 | Perrin et al.           | 12 | 34,4-49,1   | 10.1111/j.1439-0272.2009.00951.x  |
| 2011 | Cassuto et al.          | 6  | 37,1-52,6   | 10.1016/j.fertnstert.2011.07.1143 |
| 2011 | Vozdova et al.          | 2  | 48,1-50,7   | 10.1016/j.fertnstert.2011.04.042  |
| 2012 | Chelli et al.           | 6  | 46,4-67,4   | 10.1007/s10815-013-9959-3         |
| 2012 | Godo et al.             | 8  | 30,2-50,7   | 10.1093/humrep/des431             |
| 2012 | Kasikova et al.         | 2  | 49,5-55,4   | 10.1007/s10815-012-9767-1         |
| 2012 | Mokanszki et al.        | 1  | 46,8        | 10.3109/19396368.2012.670868      |
| 2012 | Vozdova et al.          | 5  | 31,9-50,7   | 10.1093/humrep/der445             |
| 2013 | Ferfour et al.          | 2  | 48,1-49,6   | 10.1093/molehr/gas048             |
| 2013 | Olszewska et al.        | 10 | 34,3-62,4   | 10.1016/j.repbio.2013.06.002      |
| 2013 | Rouen et al.            | 12 | 25,2-47,7   | 10.1093/humrep/det121             |
| 2013 | Vozdova et al.          | 27 | 31,1-55,4   | 10.1007/s10815-012-9921-9         |
| 2014 | Midro et al.            | 1  | 40,37       | 10.1038/jhg.2014.92               |
| 2016 | Midro et al.            | 2  | 51,9-52.4   | 10.1007/s10815-015-0622-z         |
| 2017 | Haapaniemi Kouru et al. | 10 | 28-72       | 10.1016/j.rbmo.2017.02.013        |
| 2017 | Rouen et al.            | 10 | 23,0-51,0   | 10.1016/j.rbmo.2017.06.017        |
| 2019 | Zenagui et al.          | 7  | 33,9-43,9   | 10.1016/j.rbmo.2019.02.010        |
| 2020 | Lei et al.              | 40 | 20,2-52,5   | 10.1007/s10815-020-02013-z        |
| 2022 | Del Llano et al.        | 41 | 27,8-69,7   | -                                 |

<sup>1</sup>DOI until precised otherwise.

**Supplemental Table S8.** Mix of probes used in spermFISH analysis.

| Patient | Karyotype            | Probes                                                                                    |
|---------|----------------------|-------------------------------------------------------------------------------------------|
| P1      | t(1;4)(p21;q13)      | CEP 4 SA <sup>1</sup> , Tel 1p SO <sup>2</sup> & Tel 4q SG <sup>2</sup>                   |
| P2      | t(1;6)(q42;p22)      | CEP 1 SO <sup>1</sup> , CEP 6 SA <sup>1</sup> & Tel 1q SG <sup>2</sup>                    |
| P3      | t(1;11)(p34;q24)     | CEP 1 SO <sup>1</sup> , CEP 11 SA <sup>1</sup> & Tel 1p SG <sup>2</sup>                   |
| P4      | t(1;11)(q12;q24)     | CEP 1 SO <sup>1</sup> , CEP 11 SA <sup>1</sup> & Tel 1p SG <sup>2</sup>                   |
| P5      | t(2;4)(q24;p15,.1)   | CEP 2 SO <sup>1</sup> , CEP 4 SA <sup>1</sup> & Tel 4p SG <sup>2</sup>                    |
| P6      | t(2;7)(p25;p15.1)    | CEP 7 SO <sup>1</sup> , Tel 2p SA <sup>2</sup> & Tel 7p SG <sup>2</sup>                   |
| P7      | t(2;10)(q21;q24)     | CEP 10 SA <sup>1</sup> , Tel 2p SG <sup>2</sup> & Tel 2q SO <sup>2</sup>                  |
| P8      | t(2;12)(q14.2;q15)   | CEP 2 SO <sup>1</sup> , CEP 12 SG <sup>1</sup> & Tel 2q37.1-2q37.2 SA <sup>3</sup>        |
| P9      | t(3;11)(p24;p12)     | CEP 11 SA <sup>1</sup> , Tel 3p SG <sup>2</sup> , Tel 3q SO <sup>2</sup>                  |
| P10     | t(3;12)(q13.1;q13)   | CEP 3 SA <sup>1</sup> , Tel 3q SG <sup>2</sup> & Tel 12q SO <sup>2</sup>                  |
| P11     | t(4;8)(q31.1;p21)    | CEP 4 SA <sup>1</sup> , CEP 8 SG <sup>2</sup> & Tel 4q SO <sup>2</sup>                    |
| P12     | t(4;10)(q21;q24)     | CEP 10 SA <sup>1</sup> , Tel 4q SG <sup>2</sup> & Tel 10q SO <sup>2</sup>                 |
| P13     | t(4;14)(p14;q32)     | CEP 14 <sup>1</sup> SA, Tel 4p SG <sup>2</sup> & Tel 14q SO <sup>2</sup>                  |
| P14     | t(4;17)(p16.1;q21.3) | CEP 4 SA <sup>1</sup> , Tel 4p SO <sup>2</sup> & Tel 17q SG <sup>2</sup>                  |
| P15     | t(4;21)(q28;q21)     | CEP 4 SA <sup>1</sup> , Tel 4p SO <sup>2</sup> , Tel 21q SG <sup>2</sup>                  |
| P16     | t(5;18)(p15.1;q12.3) | CEP 18 SA <sup>1</sup> , Tel 18q SO <sup>2</sup> , Tel 5p SG <sup>2</sup>                 |
| P17     | t(6;12)(p25;p13)     | CEP 6 SA <sup>1</sup> , CEP 12 SO <sup>2</sup> & Tel 6p SG <sup>2</sup>                   |
| P18     | t(6;15)(p12;p13)     | CEP 15 SA <sup>1</sup> , CEP 6 SG <sup>1</sup> & Tel 15q SO <sup>2</sup>                  |
| P19     | t(6;15)(q12;q21)     | CEP 15 SA <sup>1</sup> , CEP 6 SG <sup>1</sup> & Tel 15q SO <sup>2</sup>                  |
| P20     | t(6;18)(p21.1;q23)   | CEP 6 SA <sup>1</sup> , Tel 6p SG <sup>2</sup> & Tel 18q SO <sup>2</sup>                  |
| P21     | t(6;18)(p21.1;q23)   | CEP 6 SA <sup>2</sup> , Tel 6p SG <sup>2</sup> & Tel 18q SO <sup>2</sup>                  |
| P22     | t(7;9)(p14;q21)      | CEP 7 SA <sup>1</sup> , CEP 9 SO <sup>2</sup> & Tel 7p SG <sup>2</sup>                    |
| P23     | t(8;16)(p12;q23)     | CEP 8 SA <sup>1</sup> , CEP 16 SO <sup>2</sup> & Tel 8q SG <sup>2</sup>                   |
| P24     | t(8;16)(p12;q23)     | CEP 8 SA <sup>1</sup> , CEP 16 SO <sup>2</sup> & Tel 8p SA <sup>2</sup>                   |
| P25     | t(8;20)(p12;q12)     | CEP 8 SA <sup>1</sup> , CEP 20 SO <sup>2</sup> & Tel 8p SA <sup>2</sup>                   |
| P26     | t(9;11)(p24;q23)     | CEP 9 SA <sup>1</sup> , CEP 11 SG <sup>2</sup> & Tel 11q SO <sup>2</sup>                  |
| P27     | t(9;17)(p22;q23)     | CEP17 SA <sup>1</sup> , CEP 9 SO <sup>2</sup> & Tel 9p SG <sup>2</sup>                    |
| P28     | t(9;17)(q22;q21)     | CEP 9 SA <sup>1</sup> , Tel 9q SG <sup>2</sup> & Tel 17q SO <sup>2</sup>                  |
| P29     | t(10;17)(q11.2;q25)  | CEP 10 SA <sup>1</sup> , Tel 10q SO, Tel 17q SG <sup>2</sup>                              |
| P30     | t(10;17)(p15;q12)    | CEP 10 SA <sup>1</sup> , Tel 10q SO, Tel 17q SG <sup>2</sup>                              |
| P31     | t(13;15)(q32;q22)    | CEP 15 SA <sup>1</sup> , Tel 13q SG, Tel 15q SO <sup>2</sup>                              |
| P32     | t(13;18)(q14;q22)    | CEP 18 SA <sup>1</sup> , Tel 18q SO <sup>2</sup> , Tel 13q SG <sup>2</sup>                |
| P33     | t(14;17)(q22;p11.2)  | CEP 17 SA <sup>1</sup> , Tel 17p SG <sup>2</sup> , Tel 14q SO <sup>2</sup>                |
| P34     | t(8;16)(p22;p12)     | Tel 16p13.3 SG <sup>3</sup> , Tel 16q24.1-24.2 SO <sup>3</sup> & CEP8 SA <sup>1</sup>     |
| P35     | t(2;13)(q33;q14)     | Tel 2q35 SO <sup>3</sup> , Tel 2p21 SA <sup>3</sup> & Tel 13q33.3 SG <sup>3</sup>         |
| P36     | t(8;19)(p23;p11)     | Tel 8q24.21 SO <sup>3</sup> , Tel 19p13.11 SA <sup>3</sup> & Tel 19q13.43 SG <sup>3</sup> |
| P37     | t(12;15)(q14;q25)    | Tel 12q24.21 SG <sup>3</sup> , Tel 15q26.1 SO <sup>3</sup> & Tel 12p13.33 SA <sup>3</sup> |
| P38     | t(8;20)(q24.3;q11)   | Tel 8p23.2 SA <sup>3</sup> , Tel 20p13 SO <sup>3</sup> & Tel 20q12 SG <sup>3</sup>        |
| P39     | t(4;5)(q35;q22)      | Tel 5p13.2 SO <sup>3</sup> , Tel 5q31 SG <sup>3</sup> & Tel 4q22.1 SA <sup>3</sup>        |
| P40     | t(1;2)(p22;p14)      | Tel 1p36.33 SG <sup>3</sup> , Tel 2p21 SO <sup>3</sup> & Tel 2q35 SA <sup>3</sup>         |
| P41     | t(2;4)(p13;q27)      | Tel 2p21 SG <sup>3</sup> , Tel 4q34.1 SO <sup>3</sup> & Tel 2q35 SA <sup>3</sup>          |

<sup>1</sup> Vysis®, ABBOTT ; <sup>2</sup> CytoCell, Amplitech ; <sup>3</sup> Homemade probe.

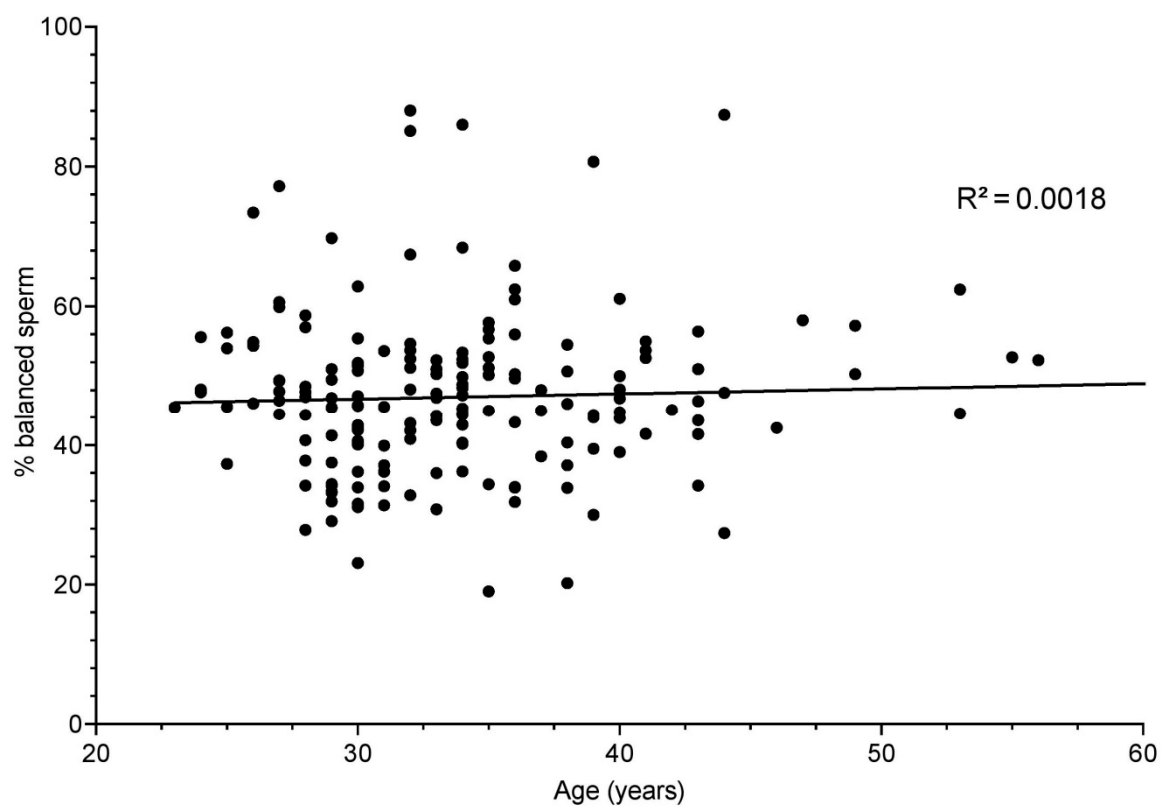

**Figure S1.** Balanced sperm rates are not correlated with patient age.
